# Supplementary figures and images for: Molecular Phylogeography of the Brown Bear (Ursus arctos) in Northeastern Asia Based on Analyses of Complete Mitochondrial DNA Sequences
Source: Oxford University Press journal article supplement (doi:10.1093/molbev/mst077), 2013-04-25

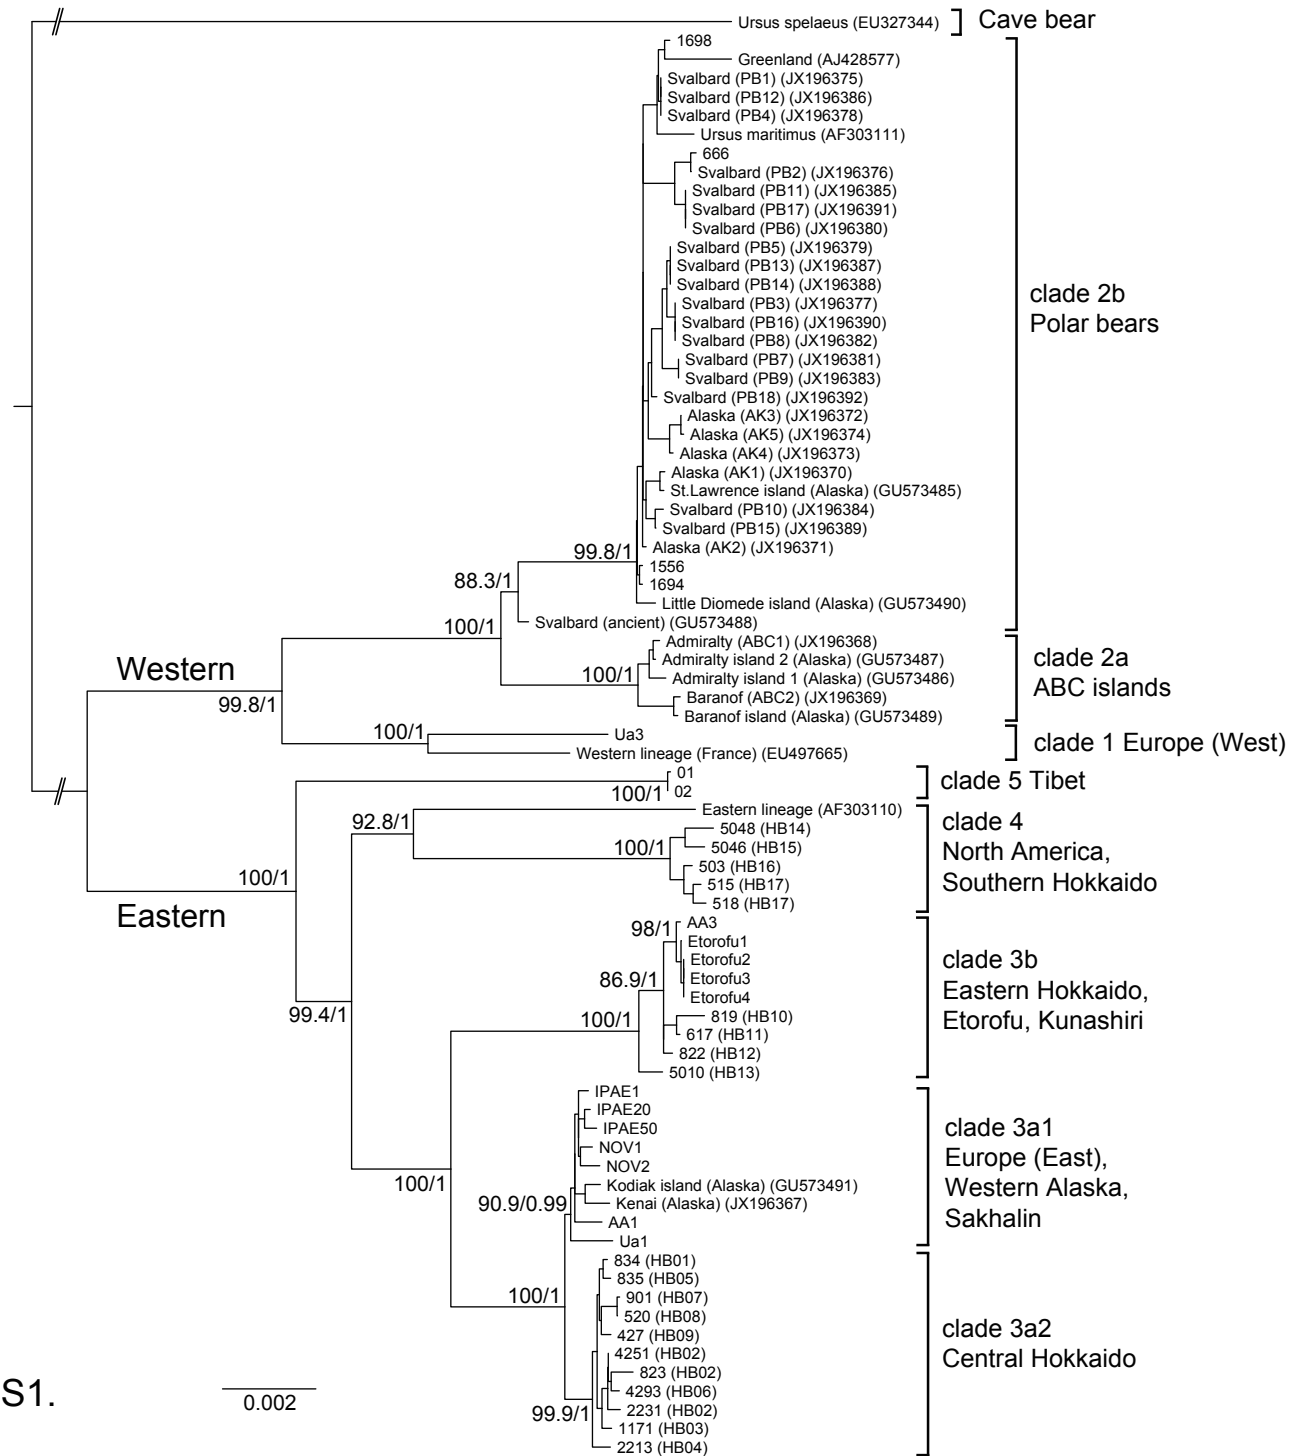

Fig. S1.

Supplement: mst077_Supplementary_Data.zip [file mst077_Supplementary_Data.zip]
